# Supplementary material for: Exploring the theranostic potential of carbon dots/Fe3 O4 superparticles for tumor-associated macrophage targeting and repolarization in colorectal cancer therapy via JAK/STAT and ERK/MAPK pathways
Source: Research Square preprint supplement (doi:10.21203/rs.3.rs-5657271/v1), 2024-12-24
Supplement: Supplementary file 1 [file a69954b081ff4a788fcdc158.docx]

**Supporting Information**

**Exploring the theranostic potential of carbon dots/Fe3O4 superparticles for tumor-associated macrophage targeting and repolarization in colorectal cancer therapy via JAK/STAT and ERK/MAPK pathways**

*Yingying Miao 1#, Xiaoyu Li 2# , Qingsen Zeng 2, Kai Zhang 2 , Lin Liu 1, Yang Bai2*, Butian Zhang 1**

1. Department of Radiology, China-Japan Union Hospital, Jilin University, Changchun 130021, P. R.China;

2.State Key Laboratory of Supramolecular Structure and Materials, Center for Supramolecular Chemical Biology, College of Chemistry, Jilin University, Changchun 130012, P.R. China

**Corresponding Authors**

Bai Yang , Email: [byangchem@jlu.edu.cn](mailto:byangchem@jlu.edu.cn)

Butian Zhang, Email: [zhangbt@jlu.edu.cn](mailto:zhangbt@jlu.edu.cn)

**Figure S1.** The assessment of immune infiltration in patients from the TCGA-COAD cohort (A) reveals differences in the abundance of M1 and M2 macrophages between tumor tissues and normal tissues (B), with the difference being more pronounced for M2 macrophages (C). Moreover, there is a negative correlation between patient survival and the abundance of M2 macrophages (D).


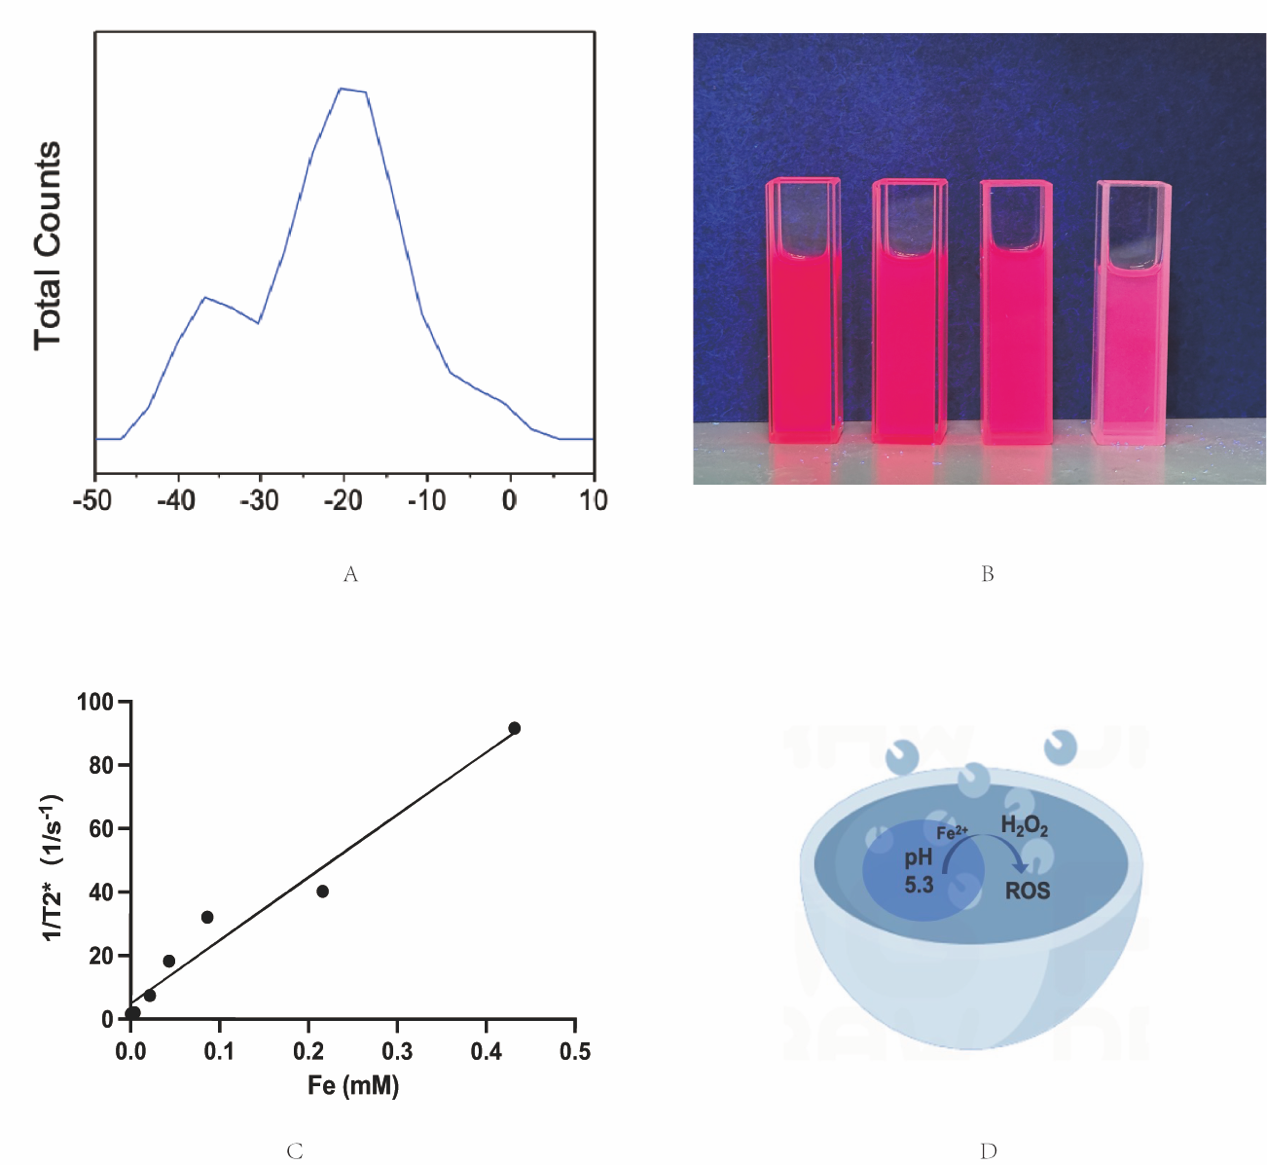


**Figure S2.** (A)**Zeta potential of** Mannose-DSPE-PEG@Fe3O4/CDs;(**B**) The fluorescence photos of the prepared carbon dots at different concentrations; (C)T2 attenuation curve; (D) The pH value of the solution used in the experiment was 5.3


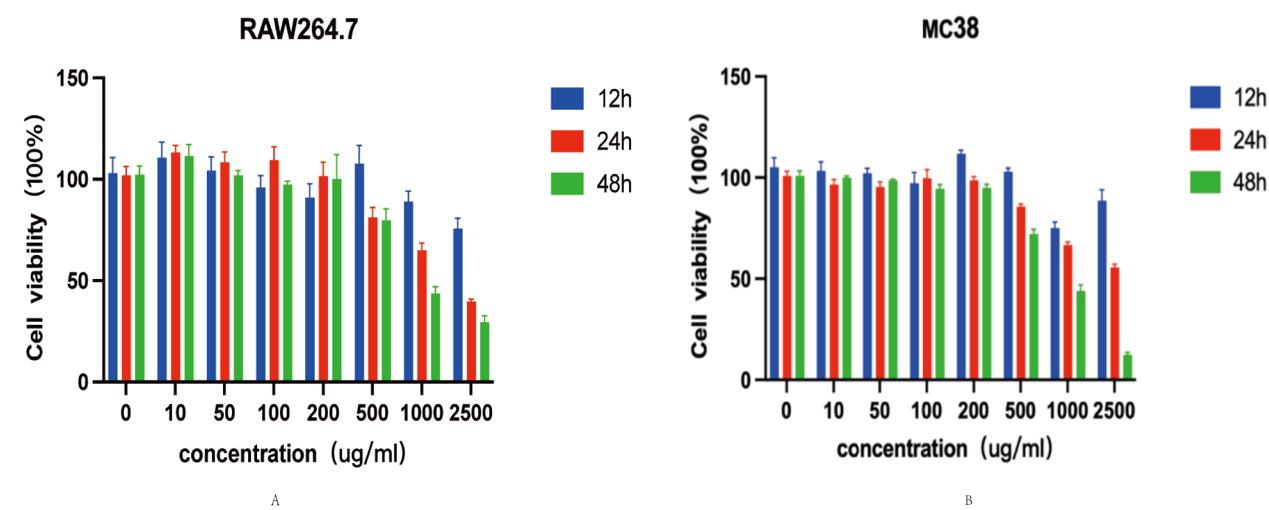


**Figure S3.** Safety of Mannose-DSPE-PEG@Fe3O4/CDs. CCK8 detection and concentration were 0, 10, 50, 100, 500, 1000, 2500ug/ml Mannose-DSPE-PEG@Fe3O4/CDs co-incubated for 12h, 24h, 48h after RAW264.7 cells (A) and MC38 cell viability (B).


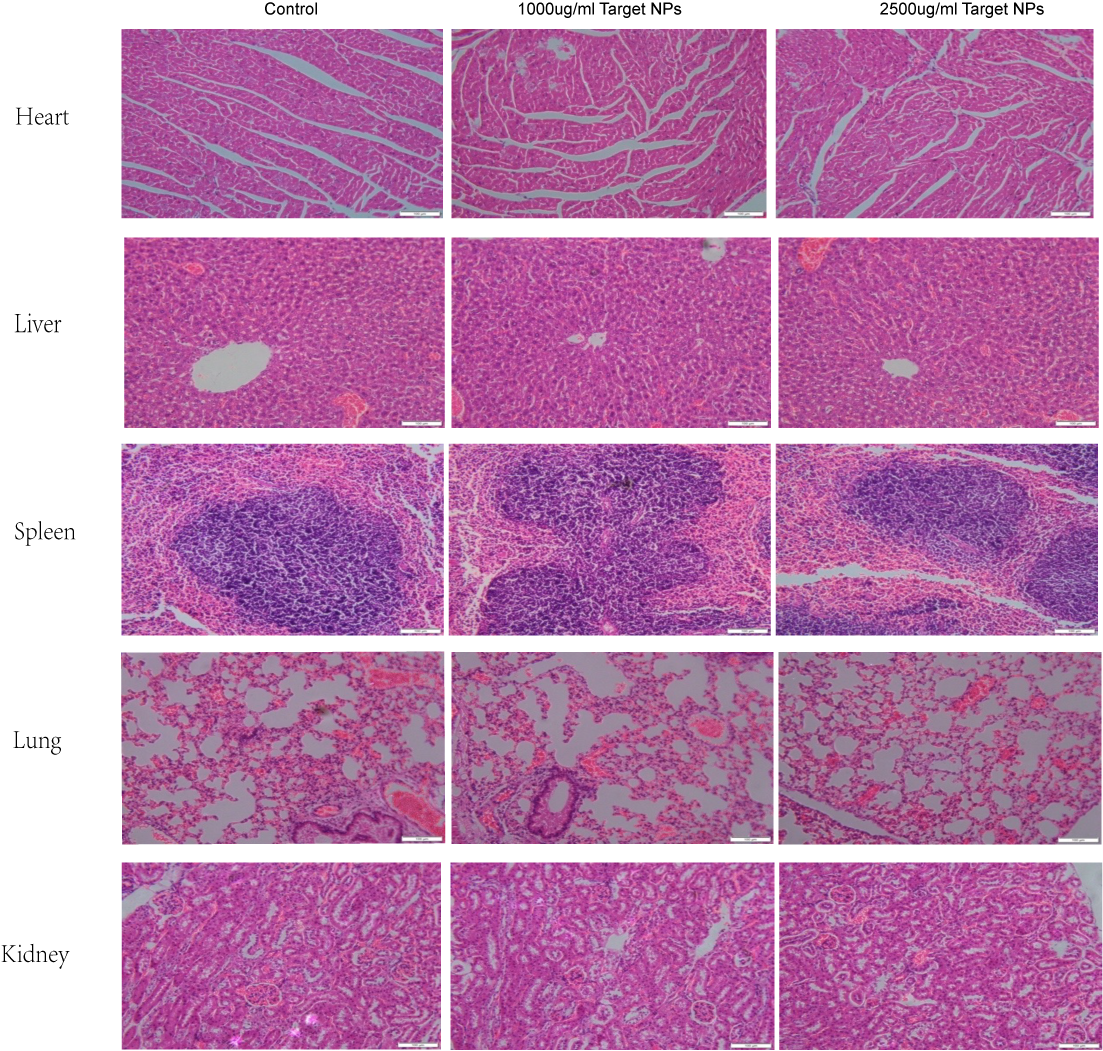


**Figure S4.** HE-stained pathological sections of different organs after tail vein injection of 1000ug/ml and 2500ug/ml Mannose-DSPE-PEG@Fe3O4/CDs nanoparticles.


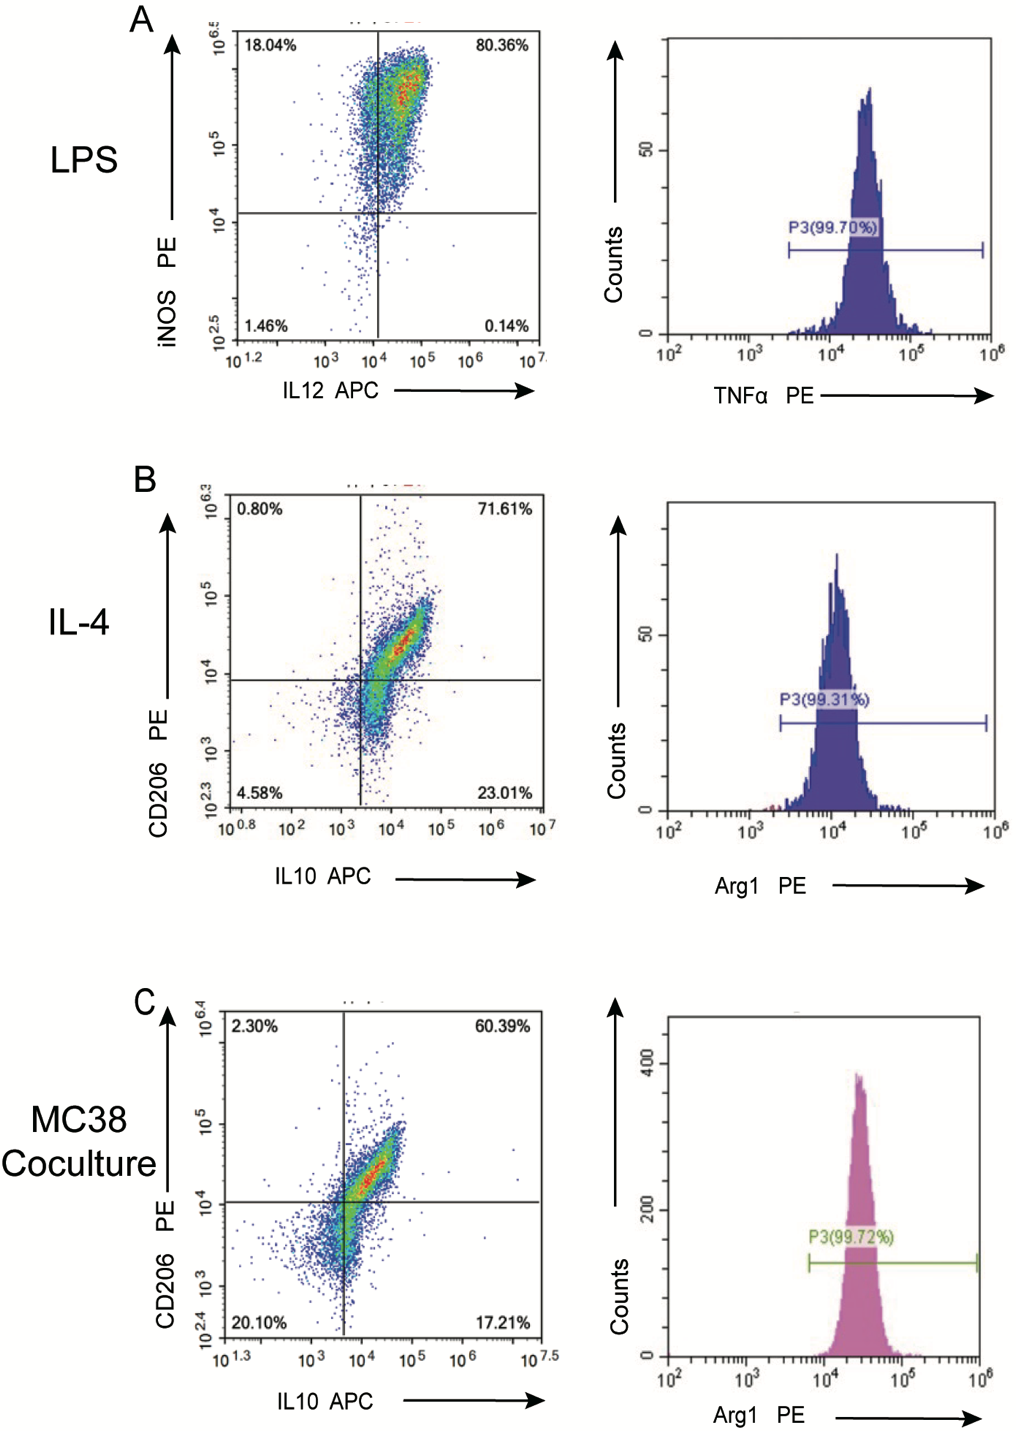


**Figure S5.** Phenotypes of different types of macrophages. (A). RAW264.7 cells were induced into M1 type by LPS, and the levels of IL-12, i-NOS and TNF-a cytokines were detected by flow cytometry. (B)RAW264.7 was induced into M2 type by IL-4, and the levels of IL-10, CD206, and ARG1 cytokines were detected by flow cytometry. (C) RAW264.7 was co-cultured with MC38, and the levels of IL-10, CD206, and ARG1 cytokines were detected by flow cytometry.

| Primer sequence (5’-3’) |
| --- |
| a）IL12， Forward CCGGCAAACCCAAGGTCTAC  Reverse AATGTAGAGGTGGCCCTGCT  b）TNFα， Forward ATGTCTCAGCCTCTTCTCATTC  Reverse GCTTGTCACTCGAATTTTGAGA  c）CD86， Forward ACGGAGTCAATGAAGATTTCCT  Reverse GATTCGGCTTCTTGTGACATAC  d）CD206， Forward GACGCTCGGAACTGTAGCAC  Reverse TCATGTTTGCCGTCACTCCG  e）ARG1， Forward CATATCTGCCAAAGACATCGTG  Reverse GACATCAAAGCTCAGGTGAATC  f）VEGF， Forward GGGCTCTTCTCGCTCCGTAGTAG  Reverse CCCTCTCCTCTTCCTTCTCTTCCTC  g）GAPDH，Forward GGTTGTCTCCTGCGACTTCA  Reverse TGGTCCAGGGTTTCTTACTCC |

**Table1.** Primer sequences.
